# Supplementary material
Source: PubMed Central journal article supplement (PMC5529142)
Supplement: NIHMS871754-supplement-suppl.pdf [file NIHMS871754-supplement-suppl.pdf]

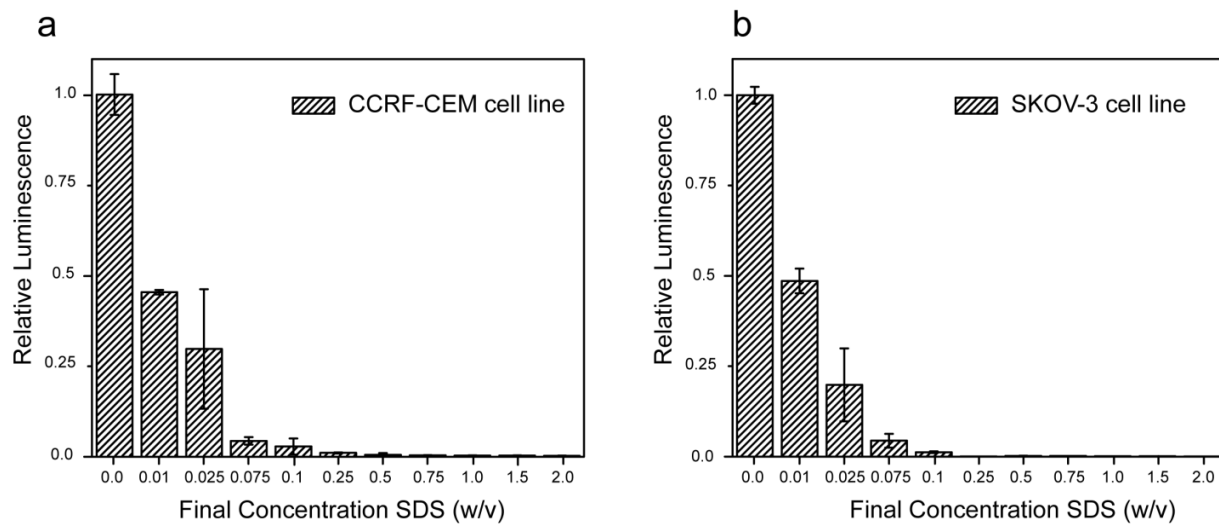

**Supplementary Figure S1| Assessment of residual enzymatic activity following addition of different amounts of SDS to CCRF-CEM and SKOV-3 cell lines.** Relative luminescence intensity after addition of different amounts of SDS (final concentration ranging from 0.01 to 2%) to (a) CCRF-CEM and (b) SKOV-3 cells. The luminescence intensities are normalized to the luminescence value of the sample without SDS. Each bar and the error bars represent the mean-normalized luminescence and the SEM of 6 independent replicates, respectively.

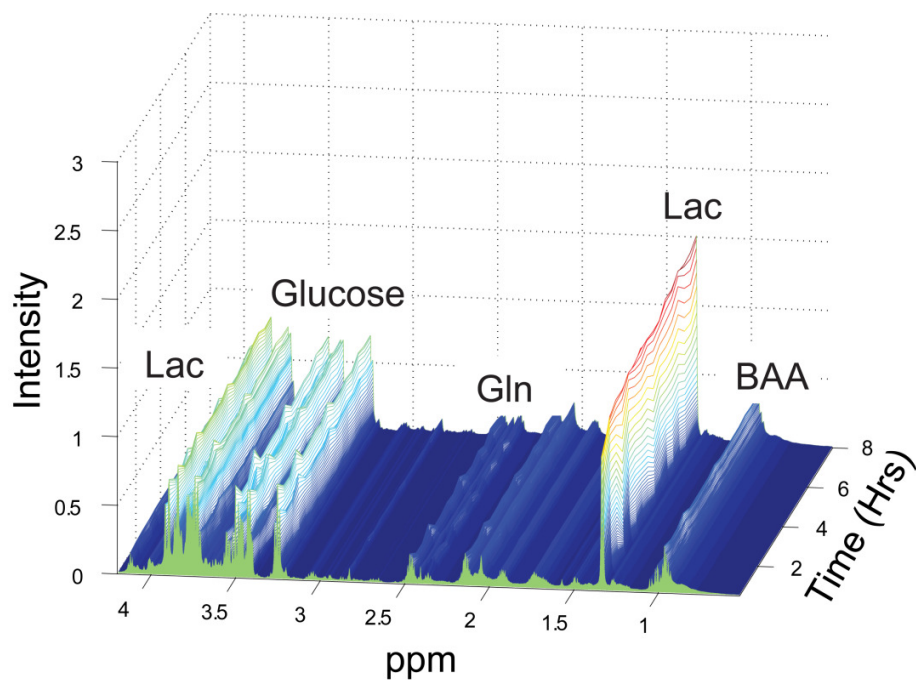

**Supplementary Figure S2 | Assessment of residual metabolism in lysed CCRF-CEM cells.** Series of 1D NMR spectra acquired every 30 minutes for a total of eight hours on cells lysed by ultrasonication without quenching the enzymatic activity. NMR signal intensities were normalized, as for the spectra in **Figure 1(b-c)**, using the first spectrum of the time series (BAA, branched amino acids; lactate; Gln, glutamine).

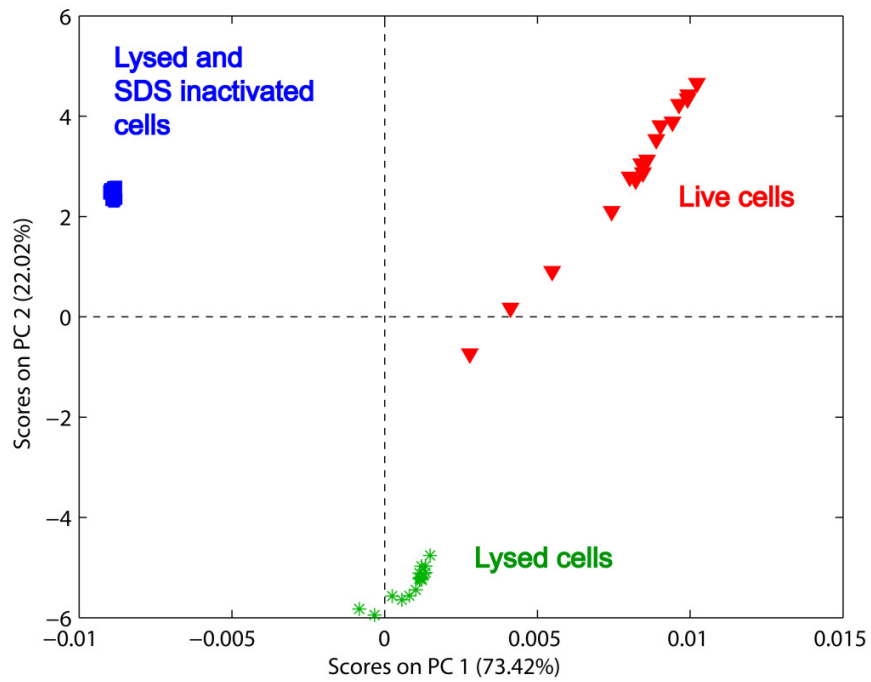

**Supplementary Figure S3 | Assessment of residual metabolism in CCRF-CEM cells using multivariate analysis.** Principal component analysis was performed on  $^1\text{H}$  NMR spectra of CCRF-CEM cells acquired every 30 minutes over a period of 8 hours for live cells, cell lysed using only ultrasonication and cells simultaneously lysed and SDS inactivated. 16 spectra per condition were included in the multivariate analysis.

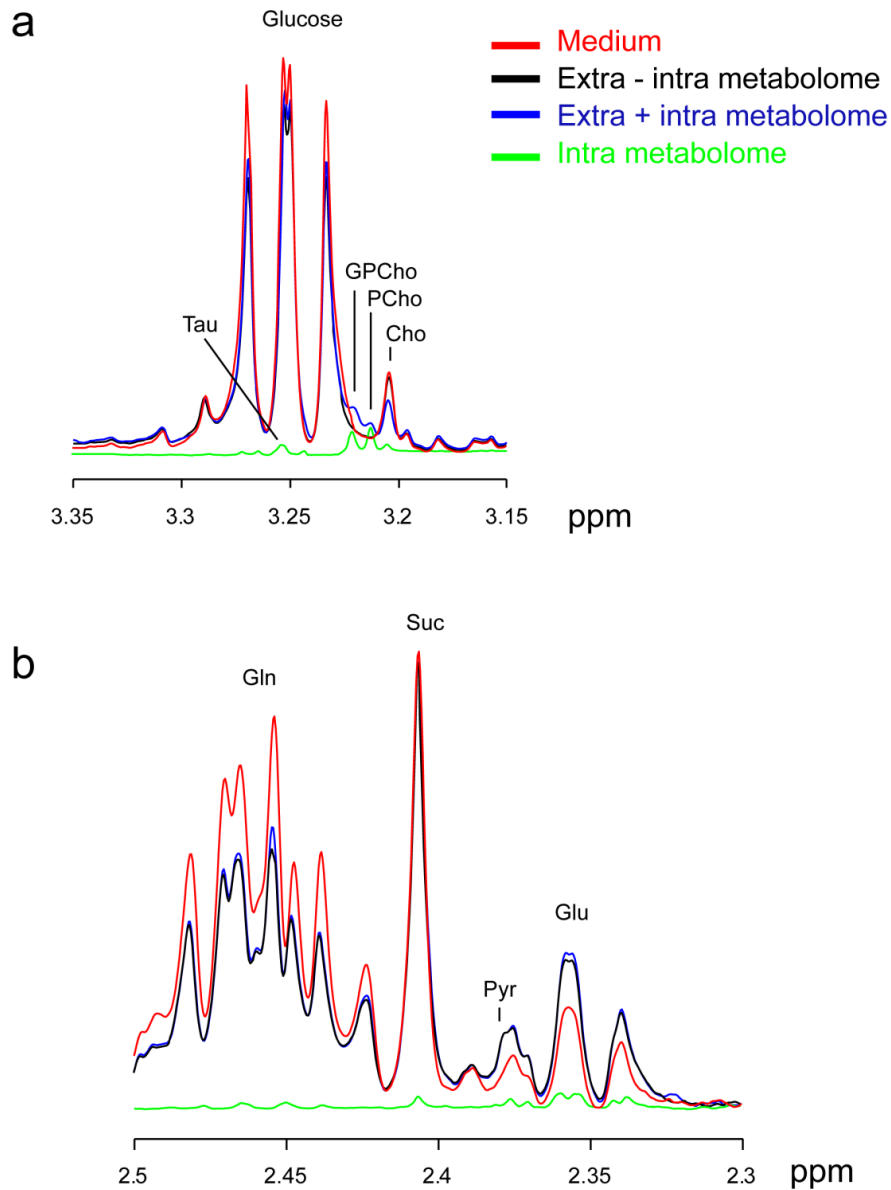

**Supplementary Figure S4 | Contribution of intracellular metabolome to the NMR spectra acquired on the entire well content.** NMR spectra were acquired on the entire well content (including both endo- and exo-metabolomes), on the media incubated in the same 96-well plate where cells were seeded (in an empty well, not seeded with cells) and on the exo-metabolome and endo-metabolome previously separated. Representative expanded sections of  $^1\text{H}$  NMR spectrum show the individual contributes of exo- and/or endo-metabolome to the NMR spectrum acquired for the entire well content (Tau, taurine; Gluc, glucose; GPCho, glycerophosphocholine; PCho, phosphocholine; Cho, choline; Pyr, pyruvate; Gln, glutamine; Glu, glutamate; Suc, succinate).

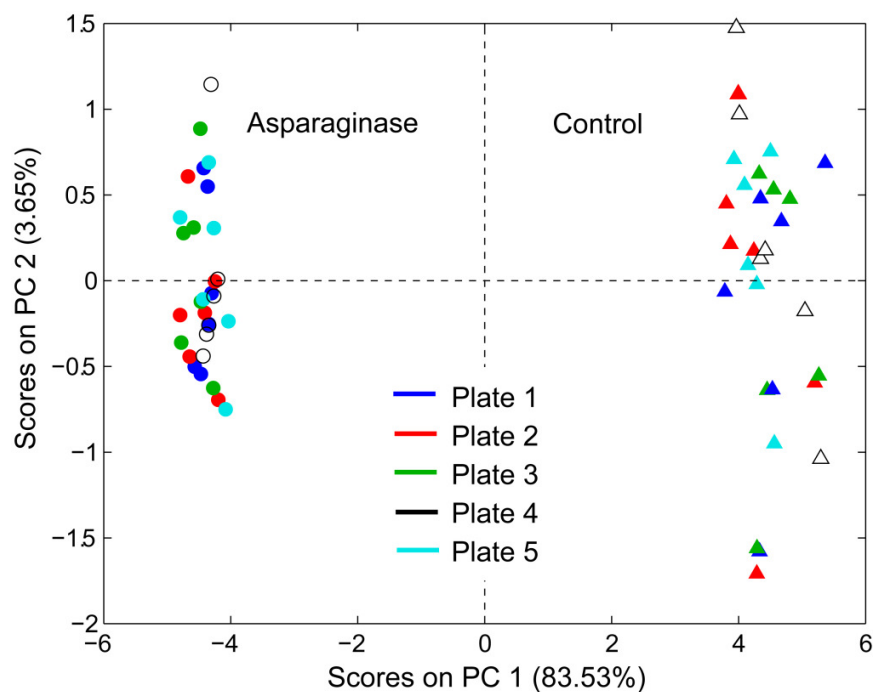

**Supplementary Figure S5 | Assessment of plate-to-plate variability.** PCA score plot (PC1 *versus* PC2) obtained from the analysis of the  $^1\text{H-NMR}$  spectra acquired on simultaneously lysed and SDS-inactivated CCRF-CEM cell samples with and without asparaginase (1 u/ml) treatment. The cells were seeded and treated in randomized well positions, 6 wells per plate, over 5 different plates (in total 60  $^1\text{H-NMR}$  spectra, 30 replicates per treatment condition). We observed excellent grouping within each treatment condition and separation between the two groups along the first principal component (PC1 85.29%) without any relation to the plate of origin of the specific sample analyzed. Similarly also the higher principal components indicated no separation between samples prepared from different plates. In addition, the similar multivariate Z-factor values (calculated as detailed in Methods, **Eq. 2**) for each plate (**Supplementary Table 1**) support the robustness and the reproducibility of the method.

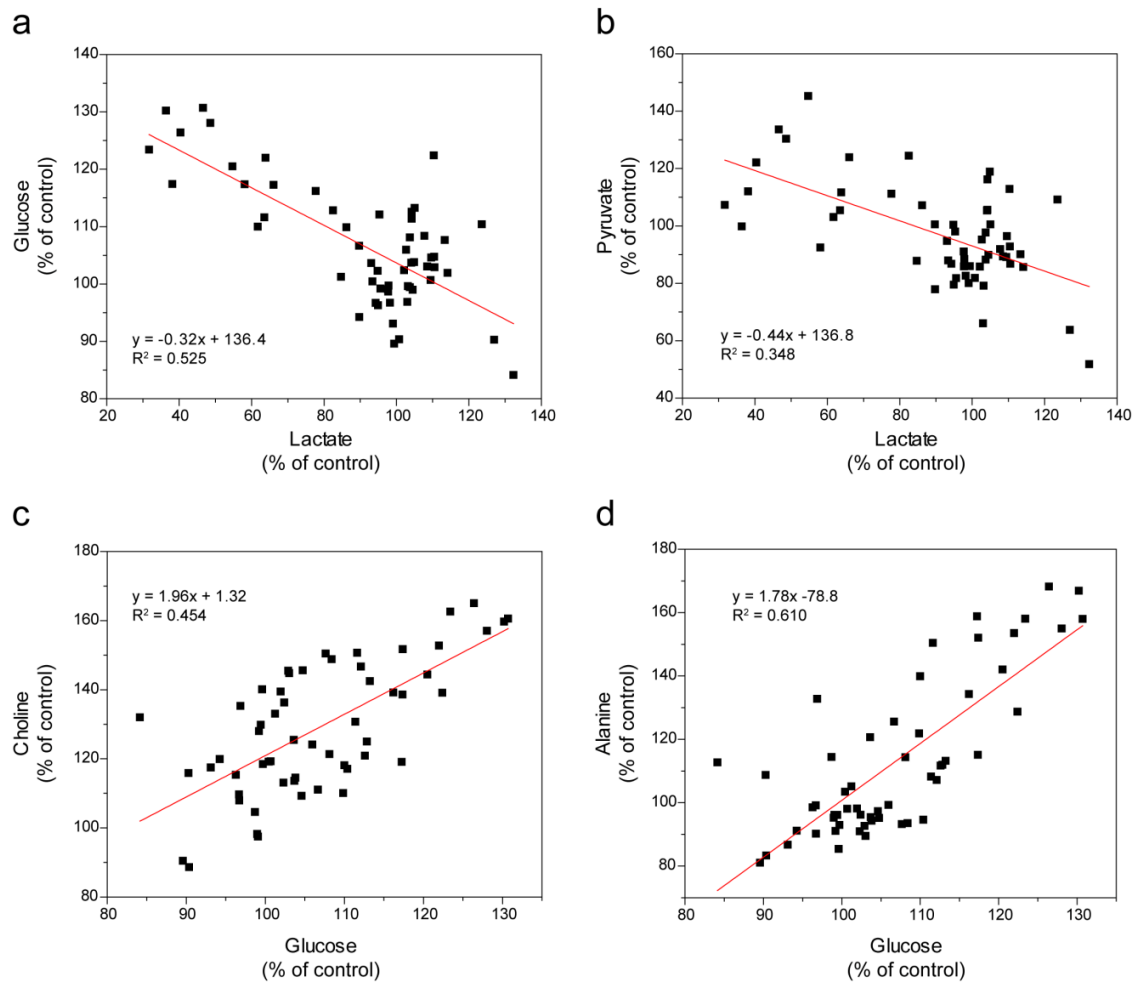

**Supplementary Figure S6 | Pair-wise correlation of metabolites obtained screening a library of kinase inhibitors.** Pair-wise correlation of relative concentrations (as percent of control) of selected metabolites obtained by screening CCRF-CEM cells following 24 hours of treatment with 56 KIs. **(a)** Correlation between lactate and glucose, **(b)** lactate and pyruvate, **(c)** glucose and choline and **(d)** glucose and alanine are shown.

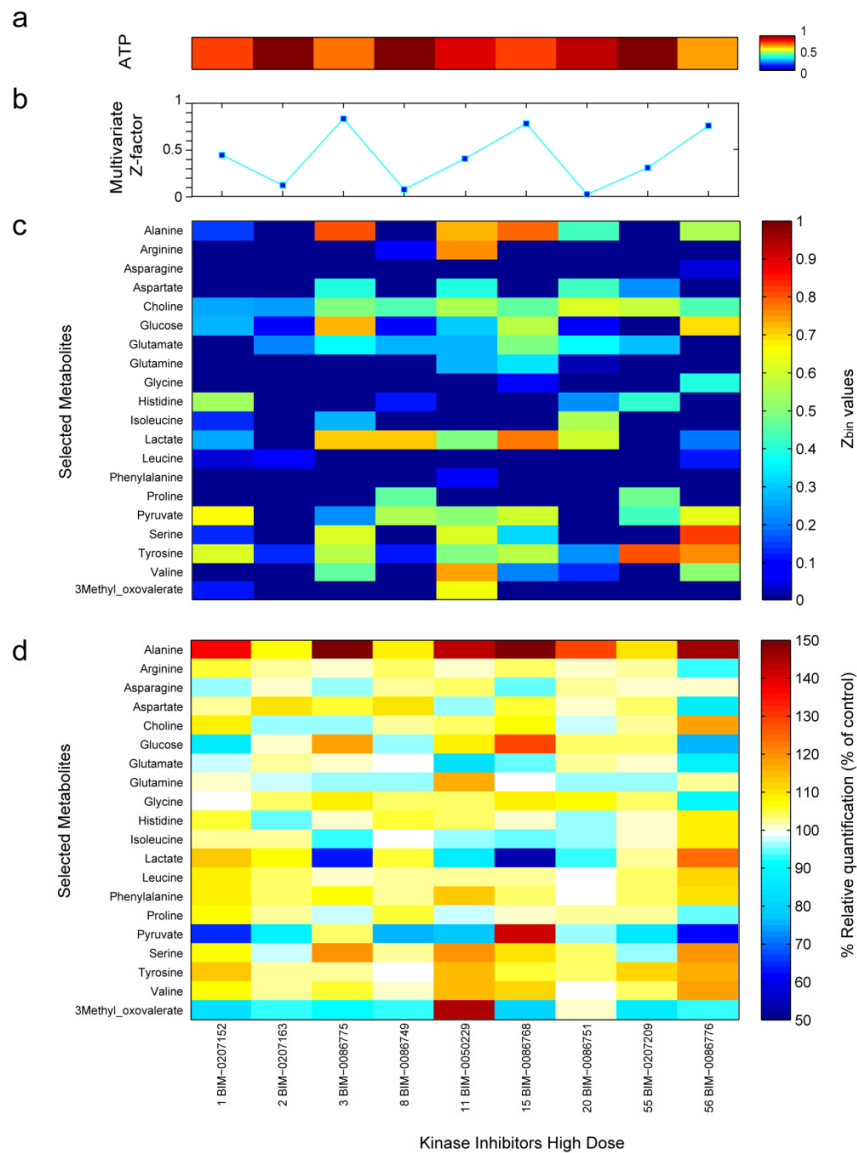

**Supplementary Figure S7 | High-content NMR-based metabolomic screening of nine selected KI at 1  $\mu$ M as final concentration (high dose).** (a) ATP assay was used to measure the cell viability of CCRF-CEM cells following 24 hours of treatment with 9 selected KI. The drugs were eEF-2 kinase inhibitor (BIM-0207152), *5-Iodo-indirubin-3'-monoxime* (BIM-0207163), MK2a inhibitor (BIM-0086775), ERK Inhibitor II, FR180204 (BIM-0086749), PKC inhibitor (BIM-0050229), K-252a, Nocardiosis sp. (BIM-0086768), *Fascaplysin*, *Synthetic* (BIM-0086751), Wee1 Inhibitor II (BIM-0207209), and NF-KB activation inhibitor (BIM-0086776) all administered at 1  $\mu$ M (high dose). (b) Principal component analysis was performed on the  $^1\text{H}$  NMR spectra acquired in triplicates and a multivariate Z-factor value was calculated for each KI. For a subset of all the observed metabolites we determined the  $Z_{\text{bin}}$  values (c) and their relative concentration (d, as percent of control).

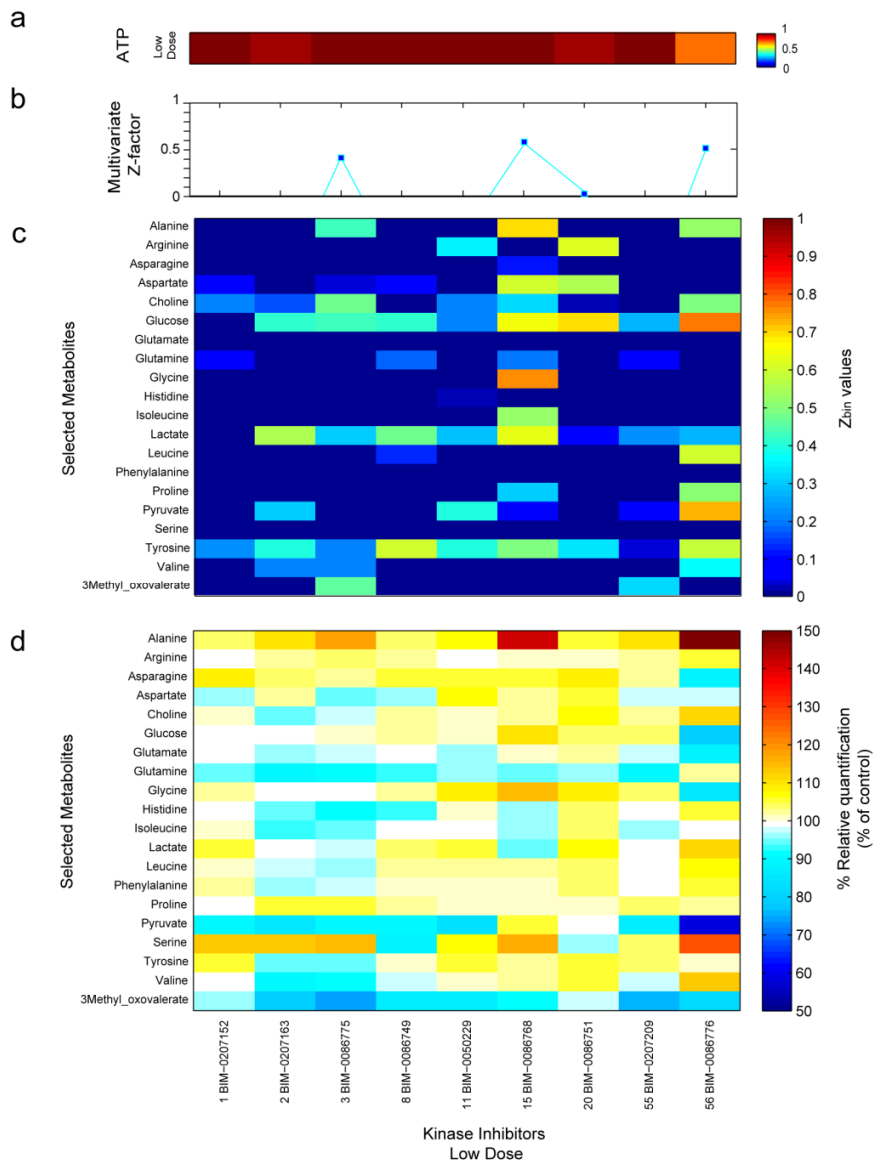

**Supplementary Figure S8 | High-content NMR-based metabolomic screening of nine selected KIs at 0.1  $\mu\text{M}$  as final concentration (low dose).** (a) ATP assay was used to measure the cell viability of CCRF-CEM cells following 24 hours of treatment with 9 selected KIs. The drugs were eEF-2 kinase inhibitor (BIM-0207152), 5-Iodo-indirubin-3'-monoxime (BIM-0207163), MK2a inhibitor (BIM-0086775), ERK Inhibitor II, FR180204 (BIM-0086749), PKC inhibitor (BIM-0050229), K-252a, Nocardiosis sp. (BIM-0086768), *Fascaplysin*, Synthetic (BIM-0086751), Wee1 Inhibitor II (BIM-0207209), and NF-KB activation inhibitor (BIM-0086776) all administered at 0.1  $\mu\text{M}$  (low dose). (b) Principal component analysis was performed on the  $^1\text{H}$  NMR spectra acquired in triplicates and a multivariate Z-factor value was calculated for each KI. For a subset of all the observed metabolites we determined the Z<sub>bin</sub> values (c) and their relative concentration (d, as percent of control).



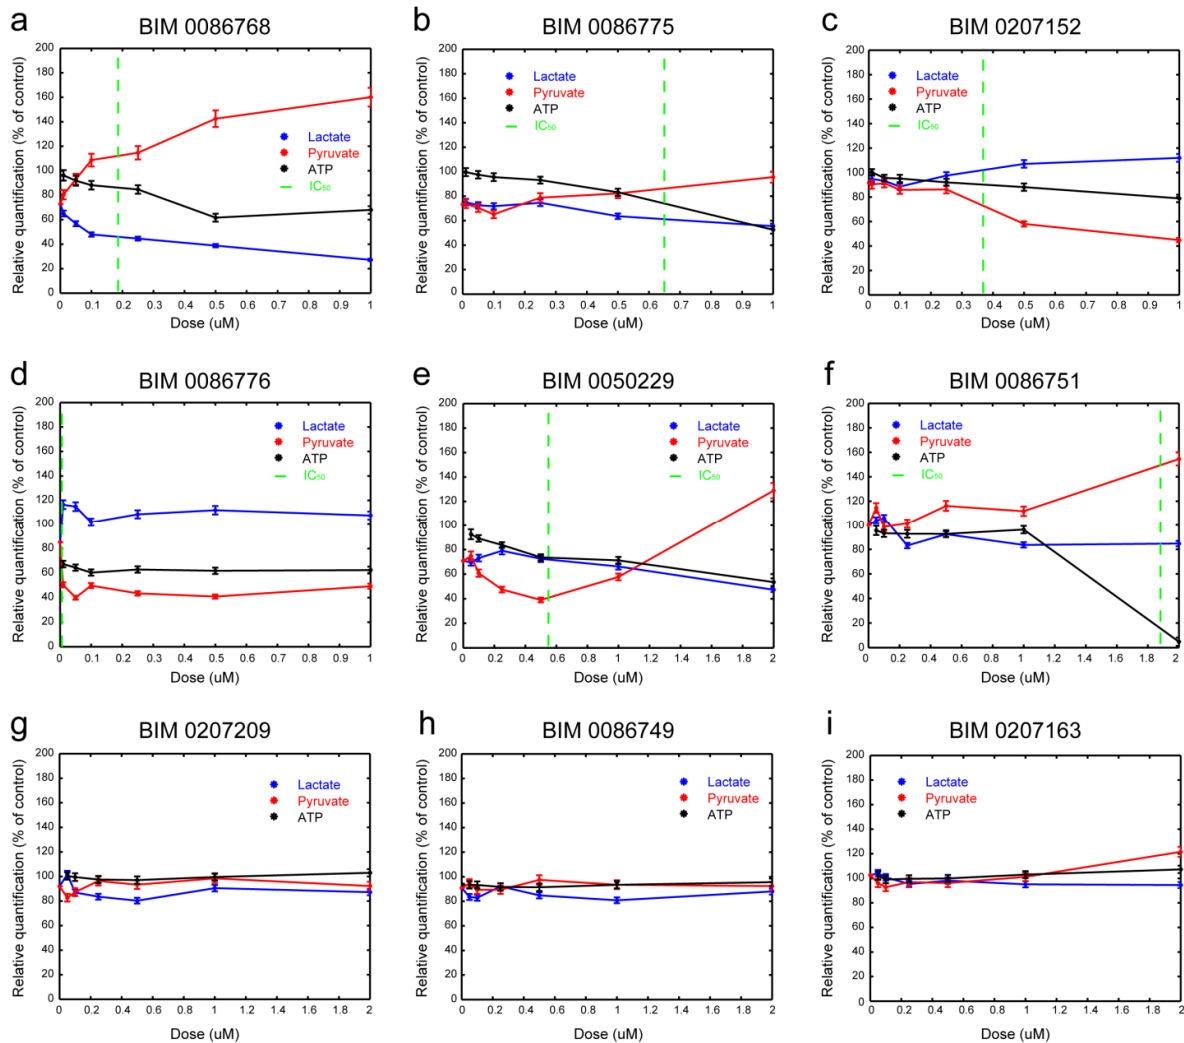

**Supplementary Figure S9 | Dose response experiments at different concentrations of selected KIs.** ATP assay and high-content NMR-based metabolomic screening were used to measure the cell viability and the metabolomic response of CCRF-CEM cells following 24 hours of treatment using six different concentrations of KI in the range of 0.05-2  $\mu\text{M}$ . These doses are within the clinical relevant dose range for other KIs. ATP levels and relative concentrations of lactate and pyruvate calculated (as % of control) are reported as mean values  $\pm$  SEM.  $\text{IC}_{50}$  values were calculated based on a 50% reduction of ATP levels induced by treatment (**Supplementary Table S4**). The drugs were **a**) K-252a, Nocardiosis sp. (BIM-0086768), **b**) MK2a inhibitor (BIM-0086775), **c**) EF-2 kinase inhibitor (BIM-0207152), **d**) NF-KB activation inhibitor (BIM-0086776), **e**) PKC inhibitor (BIM-0050229), **f**) *Fascaplysin*, Synthetic (BIM-0086751), **g**) Wee1 Inhibitor II (BIM-0207209), **h**) ERK Inhibitor II, FR180204 (BIM-0086749), and **i**) *5-Iodo-indirubin-3'-monoxime* (BIM-0207163). For BIM-0086749, BIM-0207163, BIM-0207209 the  $\text{IC}_{50}$  values were not determined as these KIs failed to cause changes not only in ATP levels but also in lactate and pyruvate at the considered treatment doses in CCRF-CEM cells.

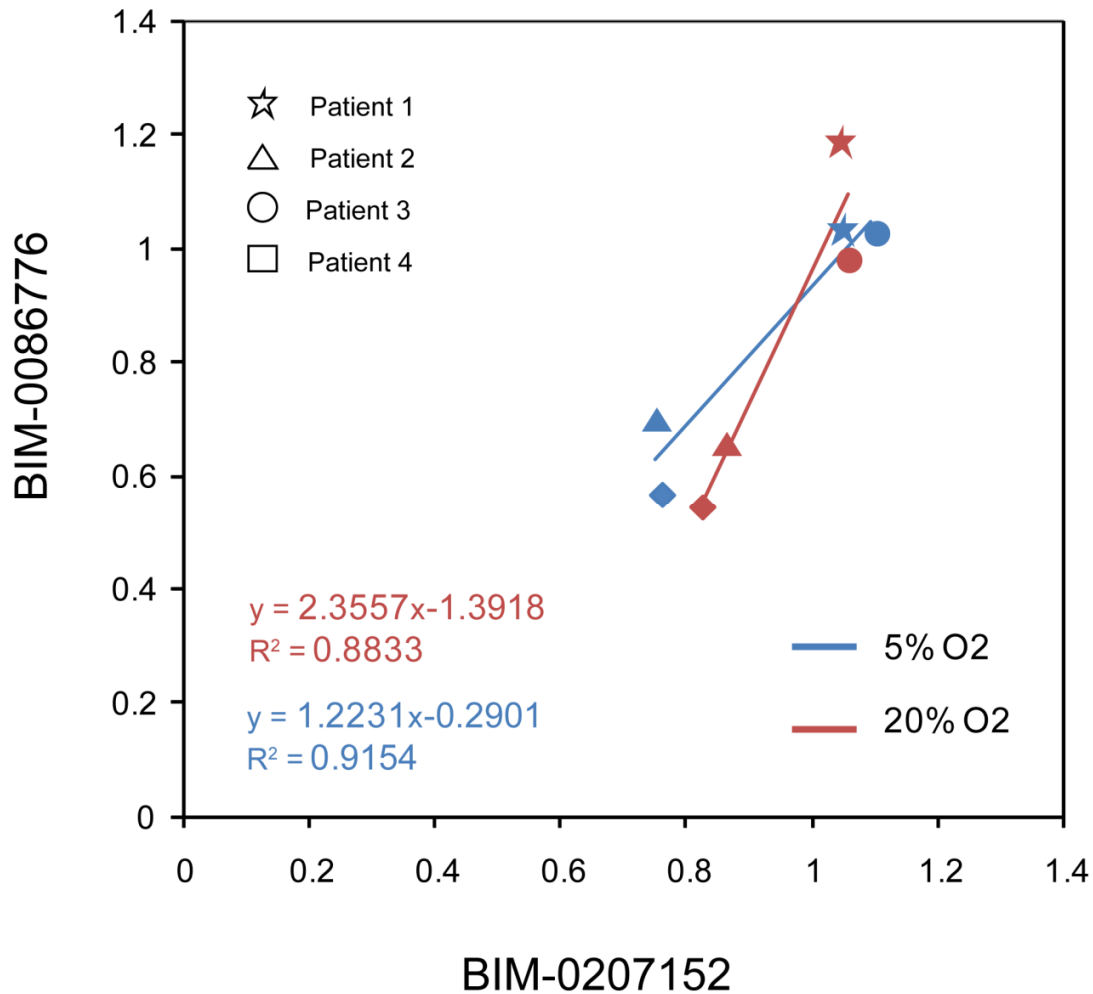

**Supplementary Figure S10 | Cell viability of acute lymphoblastic leukemia primary cells from four patients following 24 hours of NF- $\kappa$ B activation and eEF-2 kinase inhibitor treatments.** ATP measurements were performed on acute lymphoblastic leukemia primary cells from four patients. The cells were seeded for 24 hours in a 384-well plate at two different oxygen levels (20% and 5%) following individual treatment using a library of 246 kinase inhibitors (final concentration 1 $\mu$ M). Relative luminescence values were calculated by dividing the luminescence value of each sample by that of primary cells within the same plate receiving solvent control. The two kinase inhibitors BIM-0086776 (NF- $\kappa$ B activation inhibitor) and BIM-0207152 (eEF-2 kinase inhibitor) depicted similar response in the cellular survival regardless of the oxygen level in the environment. The Pearson correlation coefficient of the drug responses was 0.93983 and 0.95677 at 20% and 5% oxygen culture, respectively.

**Supplementary Table S1.** List of metabolites detected in CCRF-CEM cells using the NMR-based high content screening method. Metabolites are divided based on whether they are detectable either only in the extracellular or in both extra- and intracellular metabolome of CCRF-CEM cells contained in one well of a 96-well plate.

| Extracellular                                      | Intracellular            | Extracellular + intracellular |
|----------------------------------------------------|--------------------------|-------------------------------|
| 2-Oxoisocaproate                                   | -                        | 2-Oxoisocaproate              |
| 3-Methyl-2-oxovalerate                             | -                        | 3-Methyl-2-oxovalerate        |
| -                                                  | AMP                      | -                             |
| -                                                  | ATP                      | -                             |
| Acetate                                            | Acetate                  | Acetate                       |
| Acetone                                            | Acetone                  | Acetone                       |
| Alanine                                            | Alanine                  | Alanine                       |
| Arginine                                           | -                        |                               |
| Asparagine                                         | Asparagine               | Asparagine                    |
| Aspartate                                          | Aspartate                | Aspartate                     |
| Choline                                            | Choline                  | Choline                       |
| Creatine                                           | -                        | Creatine                      |
| Cystine                                            | -                        | Cystine                       |
| Ethanol                                            | Ethanol                  | Ethanol                       |
| Formate                                            | Formate                  | Formate                       |
| Fructose                                           | -                        | Fructose                      |
| Fumarate                                           | -                        | Fumarate                      |
| Glucose                                            | Glucose                  | Glucose                       |
| Glutamate                                          | Glutamate                | Glutamate                     |
| Glutamine                                          | Glutamine                | Glutamine                     |
| -                                                  | Glycero-3-phosphocholine | Glycero-3-phosphocholine      |
| Glycine                                            | Glycine                  | Glycine                       |
| Histidine                                          | -                        | Histidine                     |
| Isoleucine                                         | -                        | Isoleucine                    |
| Lactate                                            | Lactate                  | Lactate                       |
| Leucine                                            | -                        | Leucine                       |
| Lysine                                             | -                        | Lysine                        |
| Myo-Inositol                                       | Myo-Inositol             | Myo-Inositol                  |
| Methanol                                           | Methanol                 | Methanol                      |
| Methionine                                         | -                        | Methionine                    |
| Niacinamide                                        | -                        | Niacinamide                   |
| Ornithine                                          | -                        | Ornithine                     |
| Panhotenate                                        | -                        | Panhotenate                   |
| Phenylalanine                                      | -                        | Phenylalanine                 |
| -                                                  | Phosphocholine           | Phosphocholine                |
| Proline                                            | -                        | Proline                       |
| Propionate                                         | -                        | Propionate                    |
| Pyridoxine                                         | -                        | Pyridoxine                    |
| Pyruvate                                           | -                        | Pyruvate                      |
| Serine                                             | -                        | Serine                        |
| Succinate                                          | Succinate                | Succinate                     |
| -                                                  | Taurine                  | _*                            |
| Threonine                                          | -                        | Threonine                     |
| Tryptophan                                         | -                        | Tryptophan                    |
| Tyrosine                                           | -                        | Tyrosine                      |
| Valine                                             | -                        | Valine                        |
| trans-4-Hydroxy-L-proline                          | -                        | trans-4-Hydroxy-L-proline     |
| _*Taurine covered by glucose signals of the medium |                          |                               |

**Supplementary Table S2.** Comparison of percent variability explained by the first two components (PC1 % and PC2 %) of the principal component analysis and multivariate Z-factor values (Z, calculated using equation 2) of one-dimensional (1D) <sup>1</sup>H NMR spectra acquired on CCRF-CEM leukemia cells as solvent control and treated asparaginase at A1, 1 u/ml for 5 different plates.

|            | PC1 % | PC2 % | Z    |
|------------|-------|-------|------|
| Plate1     | 87.77 | 3.97  | 0.90 |
| Plate2     | 88.04 | 3.06  | 0.82 |
| Plate3     | 88.14 | 3.93  | 0.77 |
| Plate4     | 85.97 | 4.023 | 0.83 |
| Plate5     | 87.55 | 4.86  | 0.84 |
| All Plates | 83.53 | 3.65  | 0.79 |

**Supplementary Table S3.** Comparison of percent variability explained by the first two components (PC1 % and PC2 %) of the principal component analysis and multivariate Z factor values (Z, calculated using equation 2) of <sup>1</sup>H NMR spectra acquired using one-dimensional (1D), CPMG and 1D projections of 2D JRES spectra (pJRES) for CCRF-CEM leukemia cells treated with dexamethasone (Dex), dichloroacetate (DCA), rapamycin, (Rap) vincristine (Vin) and asparaginase at three different doses (A1, 1 u/ml; A01, 0.1 u/ml; A001, 0.01 u/ml).

| Drug Tr. | 1D    |       |       | CPMG  |       |       | pJRES |       |      |
|----------|-------|-------|-------|-------|-------|-------|-------|-------|------|
|          | PC1 % | PC2 % | Z     | PC1 % | PC2 % | Z     | PC1 % | PC2 % | Z    |
| Dex      | 51.98 | 31.93 | -1.86 | 58.80 | 26.40 | 0.15  | 64.01 | 10.15 | 0.41 |
| DCA      | 90.57 | 6.42  | 0.86  | 94.60 | 3.16  | 0.91  | 93.14 | 2.13  | 0.90 |
| Rap      | 70.00 | 19.49 | 0.60  | 79.63 | 10.87 | 0.74  | 79.91 | 5.88  | 0.72 |
| Vin      | 58.40 | 30.92 | -2.62 | 59.73 | 16.17 | -1.97 | 55.81 | 12.38 | 0.47 |
| A1       | 87.77 | 3.97  | 0.90  | 89.67 | 5.32  | 0.91  | 91.27 | 2.28  | 0.90 |
| A01      | 88.12 | 7.30  | 0.75  | 92.04 | 3.69  | 0.86  | 90.86 | 2.96  | 0.88 |
| A001     | 87.94 | 7.33  | 0.68  | 91.17 | 3.64  | 0.84  | 91.02 | 2.83  | 0.79 |

## Supplementary Table S4. List of 56 kinase inhibitors screened.

| Compound ID | Formula                                         | Mol Wt | Structure                                                                           | Compound Vendor | Vendor Compound ID | Salt Form        | Real Mol Wt | Comments                                                                    |
|-------------|-------------------------------------------------|--------|-------------------------------------------------------------------------------------|-----------------|--------------------|------------------|-------------|-----------------------------------------------------------------------------|
| BIM-0207152 | C <sub>27</sub> H <sub>45</sub> N <sub>2</sub>  | 397.66 |    | Calbiochem      | 324515             | HYDROIODIDE SALT | 524.6       | eEF-2 Kinase Inhibitor, NH125                                               |
| BIM-0207163 | C <sub>16</sub> H <sub>10</sub> N <sub>2</sub>  | 403.17 |    | Calbiochem      | 402086             |                  | 403.2       | Indirubin-3'-monoxime, 5-Iodo-                                              |
| BIM-0086775 | C <sub>21</sub> H <sub>20</sub> N <sub>2</sub>  | 349.4  |    | EMD Biosciences | 475863             |                  | 475.863     | MK2a Inhibitor                                                              |
| BIM-0207133 | C <sub>20</sub> H <sub>11</sub> N <sub>3</sub>  | 325.32 |    | Calbiochem      | 181305             |                  | 181.305     | 525.3 Ancryflavin A, Synthetic                                              |
| BIM-0207143 | C <sub>24</sub> H <sub>23</sub> N <sub>5</sub>  | 429.47 |    | Calbiochem      | 218713             |                  | 429.47      | Keratinocyte Differentiation Inducer                                        |
| BIM-0207183 | C <sub>16</sub> H <sub>15</sub> N <sub>3</sub>  | 313.37 |    | Calbiochem      | 528111             | Chloride SALT    | 349.8       | PI 3-K <sup>+</sup> Inhibitor IV                                            |
| BIM-0207192 | C <sub>21</sub> H <sub>27</sub> N <sub>7</sub>  | 393.49 |  | Calbiochem      | 554717             |                  | 393.49      | Reversine                                                                   |
| BIM-0086749 | C <sub>18</sub> H <sub>13</sub> N <sub>7</sub>  | 327.34 |  | EMD Biosciences | 328007             |                  | 327.34      | ERK Inhibitor II, FR180204                                                  |
| BIM-0086759 | C <sub>18</sub> H <sub>15</sub> N <sub>5</sub>  | 301.35 |  | EMD Biosciences | 361555             |                  | 361.555     | GSK-3 Inhibitor XIII                                                        |
| BIM-0207134 | C <sub>15</sub> H <sub>10</sub> Br <sup>+</sup> | 328.16 |  | Calbiochem      | 191500             |                  | 191.500     | 328.2 1-Azakempaurone                                                       |
| BIM-0050229 | C <sub>21</sub> H <sub>13</sub> BrNO            | 348.37 |  | LOPAC           | C 2932             | CHLORIDE SALT    | 348.37      | PKC inhibitor; affects translocation of PKC from cytosol to plasma membrane |
| BIM-0207144 | C <sub>14</sub> H <sub>11</sub> Br <sup>+</sup> | 395.23 |  | Calbiochem      | 219445             |                  | 219.445     | 395.2 Cdk2 Inhibitor II                                                     |
| BIM-0207165 | C <sub>11</sub> H <sub>13</sub> N <sup>+</sup>  | 392.15 |  | Calbiochem      | 407900             |                  | 392.15      | 392.1 5-Iodo-tubercidin                                                     |
| BIM-0207153 | C <sub>16</sub> H <sub>21</sub> N <sub>3</sub>  | 319.42 |  | Calbiochem      | 555550             | Chloride SALT    | 355.9       | Rho Kinase Inhibitor                                                        |

|             |           |        |                                                                                     |                 |                      |                                                 |
|-------------|-----------|--------|-------------------------------------------------------------------------------------|-----------------|----------------------|-------------------------------------------------|
| BIM-0086768 | C27H21N3  | 467.47 | 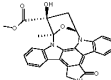   | EMD Biosciences | 420298               | K-252a, Nocardipops sp.                         |
| BIM-0053458 | C13H16N6  | 320.3  |    |                 | 154020               |                                                 |
| BIM-0207135 | C23H20N4  | 384.43 |    | Calbiochem      | 203294 Chloride SALT | 420.9 Bisdoly/maleimide III, Hydrochloride      |
| BIM-0086675 | C17H12N2  | 292.29 |    | EMD Biosciences | 343021               | Rt-3 Inhibitor II                               |
| BIM-0086735 | C18H24N6  | 340.42 |    | EMD Biosciences | 203600               | Bohemine                                        |
| BIM-0086751 | C18H11N2  | 271.29 |    | EMD Biosciences | 341251 Chloride SALT | Fascaplysin, synthetic                          |
| BIM-0050990 | C18H17NO  | 311.33 |    | LOPAC           | I 0658               | Casein kinase-1 (CK-1 delta/epsilon) inhibitor. |
| BIM-0207156 | C15H8ClF6 | 383.67 |  | Calbiochem      | 401482               | 383.7 IKK-2 Inhibitor V                         |
| BIM-0086693 | C18H16FN  | 325.34 |  | EMD Biosciences | 521233               | PDGF Receptor Tyrosine Kinase Inhibitor IV      |
| BIM-0086716 | C20H21N3  | 335.4  |  | EMD Biosciences | 616453 Chloride SALT | TGF-b RI Inhibitor III                          |
| BIM-0207195 | C18H15N3  | 321.33 |  | Calbiochem      | 555555               | 321.3 Rho Kinase Inhibitor V                    |
| BIM-0086736 | C17H11ClN | 294.74 |  | EMD Biosciences | 217695               | Cdk1 inhibitor                                  |
| BIM-0086762 | C12H10FN  | 279.29 |  | EMD Biosciences | 401481               | IKK-2 Inhibitor IV                              |
| BIM-0207137 | C24H29N7  | 431.53 |  | Calbiochem      | 203881               | 431.5 CR8, (R)-isomer                           |

|             |           |        |                                                                                     |                 |        |                                                  |
|-------------|-----------|--------|-------------------------------------------------------------------------------------|-----------------|--------|--------------------------------------------------|
| BIM-0207157 | C12H11N3  | 251.3  | 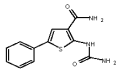   | Calbiochem      | 401483 | 251.3 IKK-2 Inhibitor VI                         |
| BIM-0086686 | C18H13N3  | 287.32 |    | EMD Biosciences | 420126 | METHANESULFONATE (MESYLATE) SA JAK3 Inhibitor VI |
| BIM-0207186 | C16H14BrN | 452.28 |    | Calbiochem      | 528116 | H2O 470.3 PI 3-K? Inhibitor VIII                 |
| BIM-0086753 | C14H10IN2 | 395.22 |    | EMD Biosciences | 361541 | GSK-3b Inhibitor II                              |
| BIM-0086780 | C19H25ON  | 388.89 |    | EMD Biosciences | 540500 | Purvalanol A                                     |
| BIM-0086695 | C10H4N6O  | 224.18 |    | EMD Biosciences | 521275 | FOXO/Akt/Fit Dual Pathway Inhibitor              |
| BIM-0207138 | C24H29N7  | 431.53 |    | Calbiochem      | 203882 | 431.5 CR8, (S)-Isomer                            |
| BIM-0086696 | C13H8N4O  | 268.29 |   | EMD Biosciences | 527450 | PKR inhibitor                                    |
| BIM-0207178 | C25H21N7  | 467.48 |  | Calbiochem      | 524611 | 467.5 PIKfyve Inhibitor                          |
| BIM-0086708 | C18H26Cl2 | 465.39 |  | EMD Biosciences | 555554 | Rho Kinase Inhibitor IV                          |
| BIM-0086723 | C17H13N3  | 307.37 |  | EMD Biosciences | 676489 | VEGF Receptor 2 Kinase Inhibitor IV              |
| BIM-0086737 | C15H13F2  | 425.44 |  | EMD Biosciences | 217714 | Cdk1/2 Inhibitor III                             |
| BIM-0086758 | C18H14N4  | 318.33 |  | EMD Biosciences | 361554 | GSK-3b Inhibitor XII, TWS119                     |
| BIM-0086710 | C28H26N4  | 466.53 |  | EMD Biosciences | 569397 | Staurosporine, Streptomycetes sp.                |



|             |           |        |                                                                                     |                 |            |                                    |
|-------------|-----------|--------|-------------------------------------------------------------------------------------|-----------------|------------|------------------------------------|
| BIM-0086658 | C23H20N4  | 400.43 | 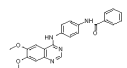   | EMD Biosciences | 189404     | Aurora Kinase Inhibitor II         |
| BIM-0086668 | C28H25F21 | 489.58 |    | EMD Biosciences | 266788     | Diacylglycerol Kinase Inhibitor II |
| BIM-0207170 | C21H16N4  | 340.38 |    | Calbiochem      | 475864 H2O | 358.4 MK-2 Inhibitor III           |
| BIM-0051107 | C13H8N4O  | 236.23 |    | LOPAC           | T 6943     | Protein tyrosine kinase inhibitor  |
| BIM-0207207 | C20H12N2  | 328.32 |    | Calbiochem      | 681637 H2O | 346.3 Wee1/Chk1 Inhibitor          |
| BIM-0207140 | C18H13N3  | 351.45 |    | Calbiochem      | 217699     | 351.4 Cdk1 Inhibitor IV, RO-3306   |
| BIM-0086681 | C30H42N2  | 574.66 |    | EMD Biosciences | 375670     | Herbimycin A, Streptomyces sp.     |
| BIM-0207160 | C22H19N3  | 469.53 |   | Calbiochem      | 401488     | 469.5 IKK-3 Inhibitor IX           |
| BIM-0207199 | C28H26N4  | 482.53 |  | Calbiochem      | 539644     | 482.5 UCN-01                       |
| BIM-0207208 | C20H11ClN | 362.77 |  | Calbiochem      | 681640     | 362.8 Wee1 Inhibitor               |
| BIM-0086789 | C13H11N3  | 241.25 |  | EMD Biosciences | 572650     | 509516                             |
| BIM-0206950 | C12H11N3  | 213.24 |  | Calbiochem      | 217707     | 213.2                              |
| BIM-0207209 | C24H19ClN | 418.87 |  | Calbiochem      | 681641     | 418.9 Wee1 Inhibitor II            |
| BIM-0086776 | C22H20N4  | 356.42 |  | EMD Biosciences | 481406     | NF-KB Activation Inhibitor         |

|             |           |        |                                                                                   |                 |            |                                                  |
|-------------|-----------|--------|-----------------------------------------------------------------------------------|-----------------|------------|--------------------------------------------------|
| BIM-0207157 | C12H11N3  | 261.3  | 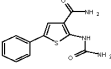 | Calbiochem      | 401483     | 261.3 IKK-2 Inhibitor VI                         |
| BIM-0086686 | C18H13N3  | 287.32 |  | EMD Biosciences | 420126     | METHANESULFONATE (MESYLATE) SA JAK3 Inhibitor VI |
| BIM-0207186 | C16H14BrN | 452.28 |  | Calbiochem      | 528116 H2O | 470.3 PI 3-K2 Inhibitor VIII                     |
| BIM-0086753 | C14H10IN2 | 395.22 |  | EMD Biosciences | 361541     | GSK-3b Inhibitor II                              |
| BIM-0086780 | C19H25ON  | 388.89 |  | EMD Biosciences | 540500     | Purvalanol A                                     |
| BIM-0086695 | C10H4N6O  | 224.18 |  | EMD Biosciences | 521275     | PKC1/Akt/Fc Dual Pathway Inhibitor               |
| BIM-0207138 | C24H29N7  | 431.53 |  | Calbiochem      | 203882     | 431.5 CREB (S)-Isomer                            |

**Supplementary Table S5.** IC<sub>50</sub> values obtained from the dose response experiments performed using 6 different concentrations of 9 KIs in a clinically relevant range (0.05-2 μM). IC<sub>50</sub> values were determined as the treatment dose that induced a 50% reduction of ATP levels. No ATP level-dependent inhibition was observed following treatment of CCRF-CEM cells with BIM-0086749, BIM-0207163, BIM-0207209 in the range of doses used in this study.

| Kinase Inhibitors | IC <sub>50</sub> (μM) ± SEM       |
|-------------------|-----------------------------------|
| BIM 0086768       | 0.190 ± 0.0078 μM                 |
| BIM 0086775       | 0.646 ± 0.0180 μM                 |
| BIM 0207152       | 0.374 ± 0.0281 μM                 |
| BIM 0086776       | 0.006 ± 1.275 e <sup>-04</sup> μM |
| BIM 0050229       | 0.545 ± 0.0087 μM                 |
| BIM 0086751       | 1.879 ± 0.055 μM                  |
| BIM 0207209       | No Effect                         |
| BIM 0086749       | No Effect                         |
| BIM 0207163       | No Effect                         |

## **Supplementary Methods**

### **miRNA transfections**

For transfection of HeLa cells, miR16 and miR122 precursors and pre-miR (as negative control; Applied Biosystems, TX) were used. The cells were transfected with TransIT-TKO (Mirus Bio Corp., WI) according to the manufacturer's instruction. Fifty  $\mu\text{L}$  of transfection mixture containing 50 nM of miRNAs and TransIT-TKO transfection reagent in Opti-mem (Invitrogen, CA) was incubated for 20-25 minutes at room temperature and added into each well. The cells were cultured with the transfection mixture for 24 hours before proceeding to the metabolomic assays. All the experiments were performed in 6 replicates per condition.

### **ATPlite luminescence measurements**

ATP Detection Assay (Perkin Elmer, MA) was used according to manufacturer's instruction to quantify the viability of cells in each well. Briefly, 50  $\mu\text{L}$  of the reagent were added to each well, and thoroughly mixed for 2 minutes at 600 rpm using a plate shaker. Luminescence was measured using Biosystems Analyst HT microplate reader (LJL Biosystems, Inc., Sunnyvale, CA). Relative luminescence values were calculated by dividing the luminescence value of each treated sample by that of cells within the same plate receiving solvent control (negative controls).

### **Multivariate Z factor and $Z_{\text{bin}}$ factor**

The projected value  $P_i^{C/T}$  for the  $i$ -th sample was calculated as a weighted sum of the solvent control (C) or drug treatment (T) spectral data values  $x_{ij}^{C/T}$  for all the  $j$  data points (np) of the

NMR spectra. The weights are obtained from the loadings values of the first principal component of a principal component analysis (PCA).

$$P_i^{C/T} = \sum_{j=1}^{np} L_j^1 \cdot x_{ij}^{C/T} \quad (\text{S1})$$

The multivariate Z factor is then calculated as:

$$Z = 1 - 3 \cdot \frac{\sigma^C + \sigma^T}{|\mu^C - \mu^T|} \quad (\text{S2})$$

Where  $\mu^C$  and  $\mu^T$ , and  $\sigma^C$  and  $\sigma^T$  are the means and standard deviations of  $P^C$  (solvent control) and  $P^T$  (drug treatment), respectively. The Z-factor can have values within the range of  $-\infty \leq Z \leq 1$ ; Z-factor values between 0.5 and 1 indicate an excellent separation of groups;  $0 \leq Z \leq 0.5$  indicates moderate separation while  $Z = 0$  points to poor separation. For  $Z < 0$ , the method is not suitable for screening.

Alternatively, a calculation of  $Z_{\text{bin}}$  factor values for every point/bin ( $i$ ) of the spectrum can be calculated as follows:

$$Z_{\text{bin}} = 1 - 3 \cdot \frac{\sigma_i^C + \sigma_i^T}{|\mu_i^C - \mu_i^T|} \quad (\text{S3})$$

where  $\mu_i^C$  and  $\mu_i^T$ , and  $\sigma_i^C$  and  $\sigma_i^T$  are the means and standard deviations at each point/bin ( $i$ ) of the NMR spectra for solvent control (C) and drug treated (T) samples, respectively.
